# Supplementary material for: Sequence-dependent DNA deformability studied using molecular dynamics simulations
Source: PubMed Central journal article supplement — Nucleic Acids Res. 2007 Aug 30;35(18):6063–74. doi: 10.1093/nar/gkm627 (PMC2094071; doi:10.1093/nar/gkm627), 2007-08-30
Supplement: nar_gkm627_1.pdf [file nar_gkm627_1.pdf]

## Supplementary Data

### Sequence-Dependent DNA Deformability Studied using Molecular Dynamics Simulations

Fujii Satoshi, Hidetoshi Kono, Shigeori Takenaka, Nobuhiro Go and Akinori Sarai

#### **1. A MD result with a coupling time of 1.0 ps for the heat bath yields a similar conformational ensemble to those obtained by MD simulations with a smaller coupling time.**

We used a smaller coupling time for the heat bath to obtain a canonical ensemble because it has shown that a MD simulation with a larger coupling time in the weak coupling thermostat proposed by Berendsen et al. [J. Chem. Phys. 81, 3684 (1984)] produces an ensemble closer to the microcanonical ensemble [Morishita, T. J. Chem. Phys., 113, 2976 (2000)].

A molecular dynamics simulation with a coupling time of 1.0 ps for the heat bath (other conditions were the same as those described in Methods section) were carried out on a 12-mer dsDNA which has AATT sequence at the center (5'-CGCGAATTCGCG-3'). The base-pair step parameters were calculated based on the ensemble of the last 9ns of a 10ns-long MD simulation (see Table S1 below).

**Table S1. Averaged base-pair step parameters over the last 9 ns (9000 conformations sampled at every 1 ps) of a 10ns-long-molecular dynamics simulation for a tetrameric sequence of AATT.**

| steps | N    | Twist | s.d. | Tilt | s.d. | Roll | s.d. | Shift | s.d. | Slide | s.d. | Rise | s.d. |
|-------|------|-------|------|------|------|------|------|-------|------|-------|------|------|------|
| AATT  | 9000 | 32.2  | 3.1  | -0.1 | 3.6  | -0.2 | 4.0  | 0.03  | 0.52 | -1.04 | 0.38 | 3.35 | 0.26 |

These values are very close to those obtained by the MD simulation with a coupling time of 1.0 fs for the heat bath (See Table S2, AATT row). The deformability  $S$  was calculated to be  $2.0 \text{ deg}^3 \text{ \AA}^3$ . This value was also close to a value of 2.7 derived from the ensemble of a 10-ns MD simulation with a coupling time of 1.0 fs for the heat bath. These results show that the MD simulations with the small coupling constant produce reasonably good ensembles of conformations at least in the space of 6 base-pair step parameters.

## 2. The table of tetrameric step parameters

**Table S2. Averaged base-pair step parameters over the last 9 ns (9000 conformations sampled at every 1 ps) of 10ns-long-molecular dynamics simulations for 136 tetrameric sequences.**

| steps | N    | Twist | s.d. | Tilt | s.d. | Roll | s.d. | Shift | s.d. | Slide | s.d. | Rise | s.d. |
|-------|------|-------|------|------|------|------|------|-------|------|-------|------|------|------|
| AAAA  | 9000 | 35.1  | 5.2  | -1.7 | 4.2  | 2.7  | 5.0  | -0.21 | 0.58 | -0.60 | 0.59 | 3.48 | 0.32 |
| AAAC  | 9000 | 34.6  | 5.5  | -1.9 | 4.2  | 1.0  | 5.1  | -0.06 | 0.54 | -0.72 | 0.61 | 3.39 | 0.32 |
| AAAG  | 8999 | 34.3  | 4.5  | -2.1 | 4.1  | 0.8  | 5.0  | 0.05  | 0.50 | -0.72 | 0.52 | 3.34 | 0.30 |
| AAAT  | 8998 | 35.8  | 4.8  | -2.3 | 4.0  | 2.1  | 4.8  | -0.23 | 0.51 | -0.68 | 0.56 | 3.46 | 0.31 |
| CAAA  | 8998 | 33.9  | 6.2  | -2.0 | 4.1  | 1.6  | 5.5  | -0.30 | 0.67 | -0.36 | 0.65 | 3.33 | 0.30 |
| CAAC  | 9000 | 35.1  | 6.9  | -2.7 | 4.0  | 0.2  | 5.4  | -0.30 | 0.67 | -0.32 | 0.61 | 3.32 | 0.29 |
| CAAG  | 9000 | 35.2  | 5.3  | -2.7 | 3.9  | 1.2  | 5.3  | -0.26 | 0.63 | -0.32 | 0.61 | 3.32 | 0.28 |
| CAAT  | 8997 | 35.2  | 5.2  | -3.0 | 4.1  | 1.0  | 5.1  | -0.38 | 0.60 | -0.51 | 0.59 | 3.35 | 0.30 |
| GAAA  | 8999 | 28.4  | 7.4  | -1.7 | 4.4  | 4.2  | 6.1  | -0.06 | 0.61 | -0.41 | 0.78 | 3.20 | 0.32 |
| GAAC  | 9000 | 32.5  | 6.2  | -3.0 | 4.4  | 1.2  | 5.3  | -0.16 | 0.61 | -0.52 | 0.65 | 3.30 | 0.32 |
| GAAG  | 9000 | 32.5  | 5.6  | -2.2 | 4.0  | 0.7  | 5.3  | 0.10  | 0.55 | -0.64 | 0.55 | 3.26 | 0.30 |
| GAAT  | 9000 | 33.9  | 4.6  | -2.3 | 4.1  | 1.0  | 4.7  | -0.17 | 0.50 | -0.72 | 0.54 | 3.35 | 0.30 |
| TAAA  | 8999 | 36.2  | 5.1  | -1.7 | 4.1  | 2.8  | 5.7  | -0.54 | 0.66 | -0.12 | 0.58 | 3.38 | 0.30 |
| TAAC  | 9000 | 35.5  | 4.3  | -2.6 | 4.1  | 2.3  | 5.3  | -0.83 | 0.80 | 0.08  | 0.76 | 3.32 | 0.30 |
| TAAG  | 8998 | 33.1  | 5.7  | -2.7 | 4.2  | 1.8  | 5.4  | -0.18 | 0.73 | -0.45 | 0.65 | 3.28 | 0.30 |
| TAAT  | 8999 | 37.6  | 5.2  | -2.9 | 4.1  | 1.1  | 5.3  | -0.61 | 0.63 | -0.26 | 0.57 | 3.40 | 0.29 |
| AAGA  | 9000 | 31.3  | 5.9  | -1.6 | 4.3  | 5.0  | 5.1  | -0.05 | 0.73 | -0.88 | 0.66 | 3.48 | 0.35 |
| AAGC  | 9000 | 33.0  | 5.0  | -2.6 | 4.4  | 4.2  | 5.2  | -0.26 | 0.67 | -1.05 | 0.57 | 3.54 | 0.31 |
| AAGG  | 8999 | 32.6  | 5.3  | -2.0 | 4.5  | 3.1  | 5.1  | -0.02 | 0.69 | -1.07 | 0.59 | 3.51 | 0.32 |
| AAGT  | 9000 | 33.9  | 4.9  | -2.9 | 4.4  | 4.6  | 4.9  | -0.28 | 0.62 | -1.10 | 0.53 | 3.57 | 0.32 |
| CAGA  | 9000 | 31.6  | 7.2  | -2.6 | 4.3  | 3.4  | 5.2  | -0.25 | 0.92 | -0.54 | 0.66 | 3.38 | 0.33 |
| CAGC  | 9000 | 35.3  | 5.4  | -3.2 | 4.1  | 2.4  | 5.6  | -0.54 | 0.74 | -0.41 | 0.60 | 3.44 | 0.31 |
| CAGG  | 8999 | 31.1  | 6.4  | -2.7 | 4.2  | 2.1  | 5.2  | -0.02 | 0.75 | -0.86 | 0.71 | 3.41 | 0.33 |
| CAGT  | 8998 | 35.2  | 5.7  | -4.8 | 4.3  | 3.7  | 5.5  | -0.57 | 0.80 | -0.55 | 0.68 | 3.48 | 0.32 |
| GAGA  | 9000 | 27.8  | 6.3  | -0.9 | 4.2  | 4.0  | 5.3  | 0.10  | 0.64 | -1.00 | 0.67 | 3.38 | 0.35 |
| GAGC  | 8999 | 29.3  | 5.9  | -1.7 | 4.3  | 2.6  | 5.0  | -0.01 | 0.66 | -1.05 | 0.62 | 3.38 | 0.34 |

|      |      |      |     |      |     |     |     |       |      |       |      |      |      |
|------|------|------|-----|------|-----|-----|-----|-------|------|-------|------|------|------|
| GAGG | 9000 | 27.7 | 6.0 | -1.5 | 4.2 | 3.1 | 5.3 | 0.26  | 0.69 | -1.09 | 0.65 | 3.42 | 0.37 |
| GAGT | 9000 | 32.5 | 4.7 | -2.3 | 4.4 | 3.2 | 5.2 | -0.29 | 0.60 | -1.17 | 0.54 | 3.50 | 0.32 |
| TAGA | 9000 | 30.8 | 7.4 | -1.6 | 4.5 | 3.5 | 5.4 | -0.28 | 0.91 | -0.69 | 0.69 | 3.37 | 0.35 |
| TAGC | 9000 | 34.3 | 5.3 | -3.1 | 4.2 | 2.5 | 5.5 | -0.51 | 0.80 | -0.58 | 0.63 | 3.38 | 0.32 |
| TAGG | 9000 | 29.2 | 7.5 | -1.9 | 4.6 | 3.2 | 5.8 | -0.23 | 0.79 | -0.95 | 0.68 | 3.35 | 0.35 |
| TAGT | 8999 | 33.9 | 5.8 | -3.2 | 4.5 | 3.7 | 5.4 | -0.52 | 0.80 | -0.80 | 0.67 | 3.44 | 0.32 |
| AGAA | 8999 | 35.3 | 6.9 | 1.0  | 4.6 | 2.9 | 5.6 | -0.30 | 0.66 | -0.48 | 0.77 | 3.47 | 0.32 |
| AGAC | 9000 | 35.0 | 5.6 | 0.3  | 4.5 | 2.3 | 5.5 | -0.12 | 0.67 | -0.68 | 0.70 | 3.41 | 0.31 |
| AGAG | 8999 | 36.1 | 5.8 | 0.2  | 4.6 | 2.1 | 6.2 | 0.02  | 0.60 | -1.06 | 0.68 | 3.48 | 0.34 |
| AGAT | 9000 | 37.6 | 4.7 | 2.6  | 4.4 | 2.2 | 5.2 | -0.26 | 0.51 | -1.04 | 0.55 | 3.59 | 0.33 |
| CGAA | 8999 | 36.9 | 6.8 | -0.1 | 4.4 | 3.1 | 5.7 | -0.53 | 0.74 | -0.02 | 0.68 | 3.42 | 0.30 |
| CGAC | 9000 | 37.8 | 4.6 | -3.2 | 4.5 | 1.6 | 5.0 | -1.02 | 0.57 | 0.36  | 0.48 | 3.33 | 0.28 |
| CGAG | 9000 | 38.0 | 5.1 | -2.2 | 4.7 | 2.2 | 5.2 | -0.74 | 0.70 | 0.24  | 0.62 | 3.39 | 0.29 |
| CGAT | 9000 | 38.8 | 5.5 | -2.4 | 4.5 | 2.7 | 5.0 | -0.86 | 0.57 | 0.20  | 0.55 | 3.46 | 0.31 |
| GGAA | 9000 | 35.9 | 6.3 | -1.1 | 4.7 | 3.5 | 5.4 | -0.57 | 0.71 | -0.19 | 0.74 | 3.33 | 0.32 |
| GGAC | 9000 | 36.4 | 5.9 | -1.2 | 4.5 | 1.6 | 5.5 | -0.41 | 0.69 | -0.33 | 0.69 | 3.31 | 0.30 |
| GGAG | 8999 | 35.0 | 5.1 | -1.4 | 4.5 | 1.4 | 5.3 | -0.20 | 0.68 | -0.64 | 0.71 | 3.33 | 0.30 |
| GGAT | 8999 | 36.7 | 5.3 | -1.0 | 4.6 | 1.8 | 5.4 | -0.32 | 0.65 | -0.58 | 0.69 | 3.42 | 0.31 |
| TGAA | 9000 | 36.9 | 6.3 | -0.5 | 4.5 | 2.5 | 5.3 | -0.60 | 0.70 | -0.12 | 0.70 | 3.40 | 0.31 |
| TGAC | 8999 | 38.9 | 4.6 | -1.6 | 4.5 | 1.7 | 5.1 | -0.77 | 0.59 | 0.14  | 0.53 | 3.36 | 0.28 |
| TGAG | 9000 | 37.0 | 5.7 | -2.3 | 4.6 | 1.6 | 5.7 | -0.59 | 0.74 | -0.10 | 0.70 | 3.33 | 0.29 |
| TGAT | 9000 | 36.4 | 6.7 | -1.4 | 4.6 | 2.9 | 5.9 | -0.37 | 0.78 | -0.32 | 0.74 | 3.35 | 0.30 |
| AGGA | 9000 | 31.5 | 4.8 | 2.4  | 4.3 | 6.3 | 4.9 | 0.09  | 0.59 | -1.45 | 0.64 | 3.69 | 0.34 |
| AGGC | 9000 | 32.9 | 5.2 | 1.2  | 4.4 | 4.8 | 5.1 | -0.05 | 0.61 | -1.26 | 0.72 | 3.63 | 0.33 |
| AGGG | 9000 | 32.3 | 4.8 | 1.3  | 4.4 | 4.5 | 5.2 | 0.09  | 0.61 | -1.34 | 0.71 | 3.60 | 0.32 |
| AGGT | 9000 | 33.1 | 4.8 | 1.4  | 4.3 | 5.9 | 4.8 | -0.07 | 0.56 | -1.53 | 0.60 | 3.72 | 0.31 |
| CGGA | 9000 | 32.5 | 8.6 | 0.6  | 4.4 | 5.1 | 5.5 | -0.26 | 0.83 | -0.28 | 0.75 | 3.49 | 0.33 |
| CGGC | 9000 | 36.4 | 5.0 | -1.9 | 4.2 | 3.8 | 5.6 | -0.69 | 0.64 | -0.12 | 0.64 | 3.45 | 0.30 |
| CGGG | 9000 | 31.9 | 5.6 | 1.5  | 4.4 | 4.9 | 5.1 | 0.12  | 0.77 | -1.03 | 0.82 | 3.56 | 0.32 |
| CGGT | 9000 | 37.4 | 5.2 | -0.8 | 4.3 | 4.7 | 5.4 | -0.58 | 0.68 | -0.45 | 0.75 | 3.62 | 0.30 |
| GGGA | 8999 | 30.8 | 6.6 | 1.3  | 4.4 | 5.9 | 5.1 | -0.01 | 0.64 | -1.24 | 0.71 | 3.57 | 0.37 |
| GGGC | 9000 | 31.3 | 5.7 | 0.1  | 4.5 | 5.0 | 5.0 | -0.13 | 0.70 | -1.24 | 0.74 | 3.52 | 0.34 |

|      |      |      |     |      |     |      |     |       |      |       |      |      |      |
|------|------|------|-----|------|-----|------|-----|-------|------|-------|------|------|------|
| GGGG | 9000 | 29.7 | 5.0 | 0.8  | 4.3 | 5.0  | 5.1 | 0.10  | 0.57 | -1.43 | 0.57 | 3.44 | 0.34 |
| GGGT | 8999 | 32.3 | 4.6 | 0.9  | 4.4 | 5.0  | 5.0 | -0.07 | 0.59 | -1.48 | 0.62 | 3.64 | 0.32 |
| TGGA | 9000 | 35.1 | 6.6 | -0.9 | 4.6 | 5.6  | 5.6 | -0.62 | 0.79 | -0.43 | 0.75 | 3.43 | 0.31 |
| TGGC | 9000 | 33.8 | 6.1 | 0.4  | 4.6 | 4.8  | 5.1 | -0.37 | 0.79 | -0.80 | 0.85 | 3.55 | 0.33 |
| TGGG | 8999 | 31.3 | 5.4 | 1.1  | 4.6 | 4.6  | 5.2 | 0.15  | 0.66 | -1.23 | 0.78 | 3.54 | 0.34 |
| TGGT | 9000 | 34.2 | 5.8 | 0.1  | 4.9 | 6.0  | 5.5 | -0.27 | 0.81 | -0.89 | 0.93 | 3.59 | 0.32 |
| AACA | 9000 | 32.5 | 4.5 | -0.8 | 4.0 | 1.9  | 4.8 | 0.10  | 0.66 | -0.99 | 0.51 | 3.39 | 0.29 |
| AACC | 8999 | 28.0 | 3.9 | 1.5  | 3.9 | -0.4 | 4.5 | 0.90  | 0.51 | -0.82 | 0.40 | 3.28 | 0.27 |
| AACG | 8999 | 33.2 | 5.0 | -0.4 | 4.2 | 0.5  | 5.7 | 0.30  | 0.74 | -0.74 | 0.51 | 3.42 | 0.30 |
| AACT | 9000 | 34.9 | 4.2 | -1.8 | 3.8 | -1.1 | 5.3 | 0.11  | 0.63 | -0.88 | 0.58 | 3.49 | 0.28 |
| CACA | 9000 | 32.3 | 5.1 | -1.2 | 4.0 | 1.3  | 5.5 | 0.23  | 0.75 | -0.69 | 0.51 | 3.32 | 0.29 |
| CACC | 9000 | 32.9 | 4.8 | -0.4 | 3.8 | -0.3 | 5.0 | 0.30  | 0.63 | -0.93 | 0.56 | 3.32 | 0.29 |
| CACG | 9000 | 31.1 | 5.4 | -0.3 | 4.2 | 0.6  | 5.6 | 0.29  | 0.80 | -0.56 | 0.48 | 3.29 | 0.30 |
| CACT | 9000 | 33.8 | 4.9 | -2.2 | 3.8 | -0.1 | 5.4 | 0.04  | 0.73 | -0.83 | 0.58 | 3.41 | 0.29 |
| GACA | 9000 | 31.1 | 5.6 | 0.2  | 4.2 | 0.3  | 5.2 | 0.41  | 0.77 | -0.66 | 0.57 | 3.31 | 0.30 |
| GACC | 8999 | 32.8 | 4.1 | -0.3 | 3.8 | 0.9  | 4.6 | 0.36  | 0.61 | -1.00 | 0.47 | 3.36 | 0.28 |
| GACG | 9000 | 30.2 | 5.4 | 0.0  | 4.2 | 1.4  | 5.1 | 0.25  | 0.72 | -0.68 | 0.50 | 3.30 | 0.31 |
| GACT | 9000 | 33.4 | 4.0 | -2.2 | 3.9 | 1.4  | 4.8 | 0.04  | 0.69 | -0.94 | 0.50 | 3.45 | 0.29 |
| TACA | 9000 | 32.3 | 4.3 | -2.2 | 4.0 | 0.9  | 5.0 | 0.21  | 0.62 | -1.05 | 0.54 | 3.37 | 0.31 |
| TACC | 9000 | 32.3 | 5.1 | 0.3  | 4.0 | 0.5  | 4.9 | 0.41  | 0.60 | -0.95 | 0.56 | 3.33 | 0.31 |
| TACG | 9000 | 31.5 | 5.6 | -0.2 | 4.2 | 0.2  | 5.7 | 0.09  | 0.79 | -0.61 | 0.50 | 3.32 | 0.32 |
| TACT | 9000 | 33.9 | 4.2 | -1.3 | 4.0 | 0.0  | 5.2 | 0.04  | 0.72 | -1.01 | 0.57 | 3.41 | 0.29 |
| AATA | 9000 | 33.8 | 3.4 | -1.2 | 3.8 | 0.0  | 4.2 | 0.27  | 0.50 | -1.22 | 0.44 | 3.32 | 0.27 |
| AATC | 9000 | 31.4 | 3.5 | 0.7  | 3.7 | -1.0 | 4.3 | 0.11  | 0.55 | -1.05 | 0.44 | 3.30 | 0.27 |
| AATG | 8999 | 32.3 | 3.6 | 0.7  | 3.7 | -1.1 | 4.5 | 0.11  | 0.61 | -0.95 | 0.43 | 3.33 | 0.27 |
| AATT | 9000 | 32.3 | 3.3 | 0.2  | 3.7 | -0.5 | 4.3 | -0.04 | 0.55 | -1.02 | 0.40 | 3.37 | 0.27 |
| CATG | 9000 | 29.6 | 4.6 | -0.1 | 3.9 | 0.9  | 5.0 | -0.03 | 0.70 | -0.82 | 0.43 | 3.25 | 0.29 |
| GATC | 9000 | 30.4 | 4.1 | 0.5  | 3.8 | -0.5 | 4.6 | 0.00  | 0.58 | -0.94 | 0.44 | 3.25 | 0.28 |
| GATG | 9000 | 28.1 | 4.6 | 0.0  | 4.0 | 1.9  | 4.8 | -0.17 | 0.65 | -0.78 | 0.44 | 3.17 | 0.29 |
| TATA | 8999 | 30.5 | 4.2 | 0.5  | 4.0 | 0.8  | 4.8 | -0.03 | 0.68 | -1.02 | 0.48 | 3.24 | 0.28 |
| TATC | 8969 | 30.4 | 4.1 | 0.1  | 3.9 | -0.4 | 4.7 | -0.04 | 0.66 | -0.92 | 0.45 | 3.23 | 0.28 |
| TATG | 8999 | 29.9 | 4.4 | 0.8  | 3.9 | 0.8  | 5.1 | -0.09 | 0.73 | -0.82 | 0.42 | 3.23 | 0.28 |

|      |      |      |     |      |     |      |     |       |      |       |      |      |      |
|------|------|------|-----|------|-----|------|-----|-------|------|-------|------|------|------|
| AGCA | 9000 | 36.2 | 4.9 | 1.0  | 4.2 | 0.9  | 5.2 | 0.12  | 0.70 | -0.77 | 0.62 | 3.45 | 0.27 |
| AGCC | 8999 | 36.9 | 4.9 | 1.2  | 4.0 | 0.3  | 5.0 | 0.04  | 0.54 | -1.00 | 0.59 | 3.49 | 0.28 |
| AGCG | 9000 | 37.4 | 5.3 | 1.0  | 4.1 | -0.7 | 5.5 | 0.21  | 0.65 | -0.54 | 0.60 | 3.51 | 0.29 |
| AGCT | 9000 | 37.5 | 4.5 | -0.2 | 4.0 | 0.2  | 4.6 | -0.07 | 0.52 | -1.04 | 0.55 | 3.57 | 0.26 |
| CGCG | 9000 | 32.3 | 8.1 | -0.5 | 4.4 | 1.0  | 5.7 | -0.08 | 0.78 | -0.16 | 0.47 | 3.31 | 0.32 |
| GGCC | 9000 | 35.5 | 5.1 | 0.0  | 4.1 | 0.8  | 5.0 | -0.04 | 0.54 | -0.89 | 0.57 | 3.35 | 0.30 |
| GGCG | 9000 | 37.1 | 5.1 | 0.2  | 4.1 | 1.1  | 5.0 | -0.34 | 0.52 | -0.89 | 0.64 | 3.39 | 0.28 |
| TGCA | 9000 | 37.1 | 5.4 | 0.1  | 4.2 | -1.2 | 5.7 | 0.02  | 0.78 | -0.26 | 0.57 | 3.38 | 0.28 |
| TGCC | 9000 | 34.6 | 6.3 | 0.8  | 4.2 | 0.1  | 5.1 | 0.12  | 0.68 | -0.65 | 0.53 | 3.35 | 0.30 |
| TGCG | 8999 | 35.9 | 6.2 | -0.4 | 4.2 | -0.4 | 5.9 | -0.08 | 0.78 | -0.28 | 0.60 | 3.40 | 0.30 |
| ACAA | 8999 | 21.6 | 9.0 | 1.8  | 4.7 | 11.3 | 5.6 | -0.39 | 0.63 | -0.41 | 0.65 | 3.21 | 0.41 |
| ACAC | 9000 | 30.7 | 7.2 | 0.5  | 5.0 | 9.4  | 6.6 | -0.35 | 0.76 | -0.58 | 0.62 | 3.44 | 0.37 |
| ACAG | 9000 | 29.5 | 7.4 | 0.5  | 4.9 | 10.3 | 6.0 | -0.22 | 0.77 | -0.65 | 0.62 | 3.40 | 0.41 |
| ACAT | 8999 | 34.7 | 5.9 | -0.4 | 5.0 | 11.3 | 6.2 | -0.43 | 0.68 | -0.77 | 0.63 | 3.65 | 0.36 |
| CCAA | 9000 | 20.0 | 6.3 | 1.9  | 4.6 | 9.8  | 5.3 | -0.36 | 0.60 | -0.41 | 0.46 | 3.07 | 0.34 |
| CCAC | 9000 | 26.6 | 6.7 | 0.3  | 4.9 | 8.7  | 6.0 | -0.40 | 0.83 | -0.36 | 0.56 | 3.21 | 0.33 |
| CCAG | 9000 | 23.4 | 5.9 | 1.2  | 4.5 | 9.1  | 5.4 | 0.06  | 0.62 | -0.33 | 0.52 | 3.06 | 0.31 |
| CCAT | 9000 | 29.9 | 6.0 | 0.6  | 5.0 | 10.4 | 5.8 | -0.39 | 0.76 | -0.60 | 0.58 | 3.35 | 0.37 |
| GCAA | 8999 | 22.8 | 7.6 | 1.7  | 4.6 | 9.8  | 5.7 | -0.20 | 0.69 | -0.42 | 0.54 | 3.21 | 0.36 |
| GCAC | 9000 | 24.6 | 7.4 | 0.3  | 4.8 | 9.0  | 6.0 | -0.45 | 0.73 | -0.39 | 0.52 | 3.20 | 0.34 |
| GCAG | 9000 | 26.9 | 7.9 | -0.1 | 4.9 | 8.7  | 6.1 | -0.29 | 0.81 | -0.37 | 0.60 | 3.23 | 0.36 |
| GCAT | 9000 | 30.6 | 6.3 | 0.5  | 5.0 | 10.0 | 6.1 | -0.26 | 0.80 | -0.70 | 0.60 | 3.49 | 0.39 |
| TCAA | 9000 | 24.3 | 8.2 | -0.2 | 5.1 | 9.9  | 6.3 | -0.46 | 0.78 | -0.24 | 0.59 | 3.23 | 0.38 |
| TCAC | 9000 | 26.3 | 7.7 | -1.2 | 4.9 | 9.4  | 6.3 | -0.27 | 0.80 | -0.19 | 0.71 | 3.19 | 0.36 |
| TCAG | 9000 | 22.9 | 7.6 | -0.2 | 4.9 | 9.4  | 5.7 | -0.33 | 0.80 | -0.24 | 0.56 | 3.11 | 0.34 |
| TCAT | 8999 | 23.0 | 7.3 | -0.6 | 4.9 | 11.1 | 5.9 | -0.24 | 0.71 | -0.15 | 0.51 | 3.16 | 0.33 |
| ACGA | 9000 | 28.8 | 9.9 | 0.8  | 5.6 | 9.6  | 6.2 | 0.08  | 0.92 | -0.32 | 0.66 | 3.37 | 0.44 |
| ACGC | 9000 | 32.3 | 8.7 | -0.2 | 5.4 | 9.0  | 6.0 | -0.13 | 0.82 | -0.31 | 0.61 | 3.43 | 0.40 |
| ACGG | 9000 | 29.3 | 9.7 | 0.0  | 5.3 | 8.6  | 5.9 | -0.01 | 0.79 | -0.39 | 0.66 | 3.32 | 0.44 |
| ACGT | 8999 | 28.5 | 5.8 | -2.5 | 5.2 | 7.4  | 6.2 | -0.88 | 0.63 | -1.18 | 0.64 | 3.74 | 0.40 |
| CCGG | 9000 | 29.5 | 8.8 | 0.7  | 5.3 | 7.1  | 6.1 | 0.26  | 0.83 | -0.08 | 0.65 | 3.21 | 0.37 |
| GCGC | 8999 | 31.6 | 6.7 | 1.1  | 5.5 | 7.6  | 6.1 | 0.25  | 0.88 | -0.44 | 0.76 | 3.46 | 0.42 |

|       |      |      |      |      |     |      |     |       |      |       |      |      |      |
|-------|------|------|------|------|-----|------|-----|-------|------|-------|------|------|------|
| GCGG  | 9000 | 22.8 | 7.4  | -0.5 | 5.0 | 6.5  | 5.7 | -0.02 | 0.81 | -0.23 | 0.50 | 3.02 | 0.32 |
| TCGA  | 8997 | 19.3 | 8.2  | -0.1 | 4.9 | 9.0  | 5.5 | 0.01  | 0.71 | -0.25 | 0.53 | 3.04 | 0.36 |
| TCGC  | 8999 | 22.9 | 7.2  | -0.1 | 4.7 | 9.1  | 5.2 | 0.00  | 0.67 | -0.32 | 0.51 | 3.11 | 0.35 |
| TCGG  | 9000 | 25.9 | 6.8  | -1.7 | 4.9 | 9.2  | 5.8 | -0.28 | 0.69 | -0.25 | 0.48 | 3.13 | 0.32 |
| ATAA  | 9000 | 29.4 | 8.2  | 1.4  | 5.0 | 11.0 | 6.8 | -0.07 | 0.84 | -0.51 | 0.70 | 3.41 | 0.38 |
| ATAC  | 8998 | 32.3 | 5.9  | -0.1 | 4.9 | 9.3  | 7.5 | -0.07 | 0.86 | -0.60 | 0.70 | 3.44 | 0.36 |
| ATAG  | 8999 | 26.8 | 8.3  | 0.4  | 5.0 | 10.5 | 7.0 | 0.30  | 0.90 | -0.35 | 0.81 | 3.27 | 0.35 |
| ATAT  | 8998 | 34.2 | 5.4  | 0.6  | 4.9 | 11.0 | 6.2 | 0.01  | 0.68 | -0.86 | 0.60 | 3.61 | 0.35 |
| CTAG  | 9000 | 24.8 | 7.4  | 0.1  | 4.9 | 10.4 | 6.7 | 0.10  | 0.93 | -0.43 | 0.60 | 3.13 | 0.33 |
| GTAC  | 9000 | 28.5 | 7.0  | 0.0  | 5.1 | 8.0  | 6.7 | -0.34 | 1.05 | -0.30 | 0.66 | 3.21 | 0.34 |
| GTAG  | 9000 | 26.6 | 7.3  | 0.2  | 4.9 | 9.1  | 6.9 | 0.22  | 0.96 | -0.32 | 0.66 | 3.19 | 0.31 |
| TTAA  | 8998 | 20.8 | 10.3 | -0.5 | 5.2 | 10.0 | 6.5 | -0.28 | 0.91 | 0.81  | 1.23 | 3.10 | 0.32 |
| TTAA* | 7003 | 23.9 | 8.6  | -0.5 | 5.1 | 10.1 | 7.0 | -0.40 | 0.96 | 0.29  | 0.82 | 3.14 | 0.31 |
| TTAC  | 8959 | 31.0 | 7.2  | -2.4 | 5.1 | 9.2  | 6.7 | -0.06 | 1.00 | -0.21 | 0.75 | 3.39 | 0.37 |
| TTAG  | 8999 | 17.0 | 10.7 | -1.5 | 5.4 | 11.3 | 5.9 | 0.08  | 0.74 | 1.15  | 1.75 | 3.15 | 0.39 |
| TTAG* | 4940 | 23.7 | 9.1  | -1.0 | 5.1 | 11.8 | 6.4 | 0.16  | 0.85 | -0.32 | 0.79 | 3.22 | 0.36 |

\*The conformations with slide > 2Å were excluded.



Table S3.  $S_{xy}$  (degree<sup>3</sup>Å<sup>3</sup>) of tetrameric steps (See Fig. 3)

| Dimer | Tetrameric steps |      |      |      |      |      |      |      |      |      |      |      |      |      |      |      |
|-------|------------------|------|------|------|------|------|------|------|------|------|------|------|------|------|------|------|
| AA    | AAAA             | AAAC | AAAG | AAAT | CAAA | CAAC | CAAG | CAAT | GAAA | GAAC | GAAG | GAAT | TAAA | TAAC | TAAG | TAAT |
| 11.2  | 7.7              | 7.1  | 4.8  | 4.8  | 10.0 | 9.3  | 6.7  | 6.5  | 19.1 | 11.4 | 7.4  | 4.9  | 9.1  | 9.7  | 11.4 | 7.2  |
| AG    | AAGA             | AAGC | AAGG | AAGT | CAGA | CAGC | CAGG | CAGT | GAGA | GAGC | GAGG | GAGT | TAGA | TAGC | TAGG | TAGT |
| 15.9  | 12.8             | 7.0  | 8.5  | 5.9  | 16.0 | 9.1  | 14.4 | 11.7 | 15.3 | 12.8 | 16.3 | 6.4  | 19.5 | 10.7 | 19.8 | 12.1 |
| GA    | AGAA             | AGAC | AGAG | AGAT | CGAA | CGAC | CGAG | CGAT | GGAA | GGAC | GGAG | GGAT | TGAA | TGAC | TGAG | TGAT |
| 15.7  | 16.9             | 12.4 | 13.8 | 6.5  | 14.7 | 5.5  | 9.9  | 7.6  | 16.5 | 12.2 | 11.5 | 11.0 | 12.0 | 6.5  | 13.3 | 16.1 |
| GG    | AGGA             | AGGC | AGGG | AGGT | CGGA | CGGC | CGGG | CGGT | GGGA | GGGC | GGGG | GGGT | TGGA | TGGC | TGGG | TGGT |
| 16.8  | 9.2              | 9.0  | 10.5 | 6.0  | 23.6 | 8.8  | 12.2 | 9.5  | 16.1 | 12.9 | 9.2  | 7.6  | 16.9 | 14.0 | 14.6 | 14.3 |
| AC    | AACA             | AACC | AACG | AACT | CACA | CACC | CACG | CACT | GACA | GACC | GACG | GACT | TACA | TACC | TACG | TACT |
| 9.4   | 6.5              | 3.0  | 9.4  | 5.7  | 9.1  | 6.5  | 9.5  | 8.0  | 11.5 | 4.5  | 9.3  | 5.7  | 6.8  | 7.9  | 10.6 | 7.4  |
| AT    | AATA             | AATC | AATG | AATT |      |      | CATG |      |      | GATC | GATG |      | TATA | TATC | TATG |      |
| 5.5   | 2.8              | 3.1  | 3.5  | 2.7  |      |      | 6.3  |      |      | 4.4  | 5.7  |      | 6.3  | 5.1  | 6.3  |      |
| GC    | AGCA             | AGCC | AGCG | AGCT |      |      | CGCG |      |      | GGCC | GGCG |      | TGCA | TGCC | TGCG |      |
| 12.3  | 8.5              | 6.0  | 8.9  | 4.3  |      |      | 14.1 |      |      | 7.0  | 6.3  |      | 10.7 | 10.1 | 13.1 |      |
| CA    | ACAA             | ACAC | ACAG | ACAT | CCAA | CCAC | CCAG | CCAT | GCAA | GCAC | GCAG | GCAT | TCAA | TCAC | TCAG | TCAT |
| 31.9  | 28.4             | 31.2 | 30.7 | 19.3 | 12.1 | 22.3 | 11.9 | 21.4 | 19.7 | 19.9 | 31.1 | 27.0 | 30.4 | 33.3 | 24.5 | 18.5 |
| CG    | ACGA             | ACGC | ACGG | ACGT |      |      | CCGG |      |      | GCGC | GCGG |      | TCGA | TCGC | TCGG |      |
| 45.2  | 50.7             | 35.1 | 43.5 | 16.3 |      |      | 33.5 |      |      | 40.7 | 17.6 |      | 21.7 | 16.2 | 13.7 |      |
| TA    | ATAA             | ATAC | ATAG | ATAT |      |      | CTAG |      |      | GTAC | GTAG |      | TTAA | TTAC | TTAG |      |
| 57.3  | 47.5             | 33.4 | 54.0 | 17.9 |      |      | 34.2 |      |      | 38.0 | 34.5 |      | 55.5 | 47.4 | 56.4 |      |
